# Supplementary material for: Oxometalate and phosphine ligand co-protected silver nanoclusters: Ag28(dppb)6(MO4)4 and Ag32(dppb)12(MO4)4(NO3)4
Source: Royal Society of Chemistry journal article supplement (doi:10.1039/c9nr07779k), 2019-12-13
Supplement: c9nr07779k1.pdf [file c9nr07779k1.pdf]

# Oxometalate and Phosphine Ligands Co-protected Silver Nanoclusters: $\text{Ag}_{28}(\text{dppb})_6(\text{MO}_4)_4$ and $\text{Ag}_{32}(\text{dppb})_{12}(\text{MO}_4)_4(\text{NO}_3)_4$

Guang-Xiong Duan,<sup>a</sup> Jun Han,<sup>a</sup> Bao-Zhu Yang,<sup>\*,b</sup> Yun-Peng Xie,<sup>\*,a</sup> Xing Lu<sup>\*,a</sup>

<sup>a</sup>State Key Laboratory of Materials Processing and Die & Mould Technology, School of Materials Science and Engineering, Huazhong University of Science and Technology (HUST), Wuhan 430074, China.

<sup>b</sup>School of Petrochemical Engineering, Changzhou University, Changzhou 213164, China.

## Experimental Section

All reagents employed are commercially available and used as received without further purification.  ${}^t\text{BuC}\equiv\text{C}\text{Ag}^{\text{S1}}$  was prepared according to literature procedure. MALDI-TOF mass spectrometry was measured with a BIFLEX III spectrometer (Bruker Daltonics Inc., Germany). NMR spectra were recorded on a Bruker AV-II 400 MHz NMR spectrometer, locked on deuterated solvents and referenced to the solvent peak. The Vis-NIR experiments were carried out on a PE Lambda 750S UV-vis-NIR spectrophotometer. Fluorescent spectra were recorded on a FP-6500 fluorescence spectrometer, using 5 mm path length cuvettes. Crystal data of **1**, **2** were collected on a Bruker D8 Quest diffractometer with Mo-K $\alpha$  radiation ( $\lambda = 0.71073 \text{ \AA}$ ). Crystal data of **3** was collected at 100 K using the radiation wavelength at  $0.65250 \text{ \AA}$  with a MX300 detector at beamline BL17B of the Shanghai Synchrotron Radiation Facility (China). Multi-scan method was used for absorption corrections. The structures were solved with direct method and were refined with SHELXL-2014.<sup>S2</sup>

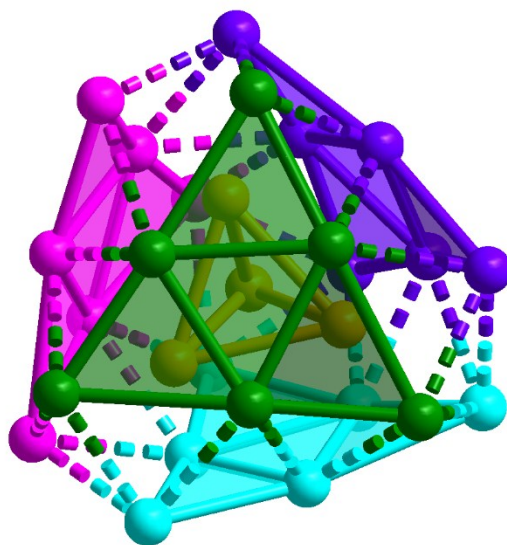

**Figure S1:** Detailed structure analysis of the  $\text{Ag}_{28}(\text{dppb})_6(\text{MoO}_4)_4$  cluster. An inner  $v_1$  tetrahedral  $\text{Ag}_4$  core capped on the four faces with four  $v_2$  triangular  $\text{Ag}_6$  facets. Dashed lines represent  $\text{Ag}\dots\text{Ag}$  interactions between neighboring  $\text{Ag}_6$  facets. Color legend: Ag, purple, pink, green, sky blue and orange.

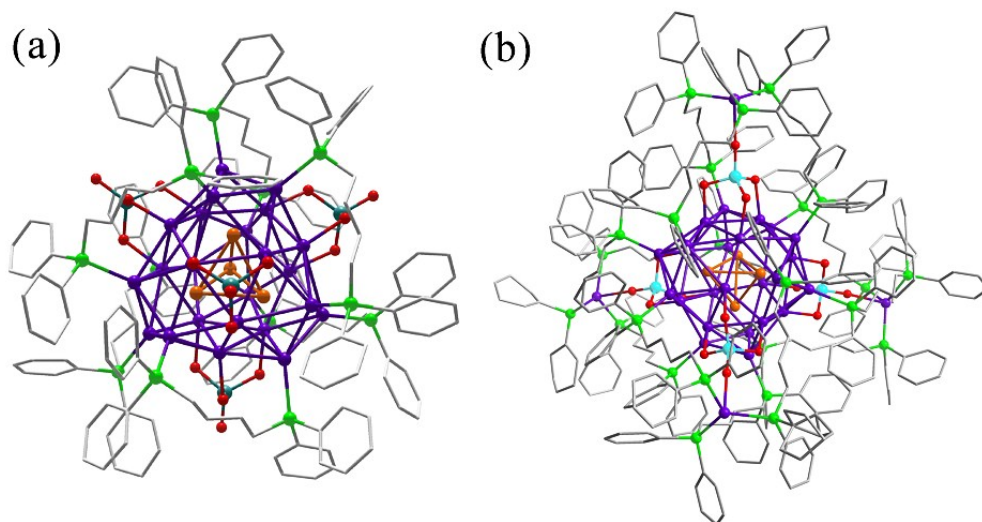

**Figure S2:** a) The structure of **2** established by X-ray crystallography. b) The structure of **3** established by X-ray crystallography. Color legend: Ag, purple, orange; P, green; Mo, blue; W cyan; O, red; C, grey.

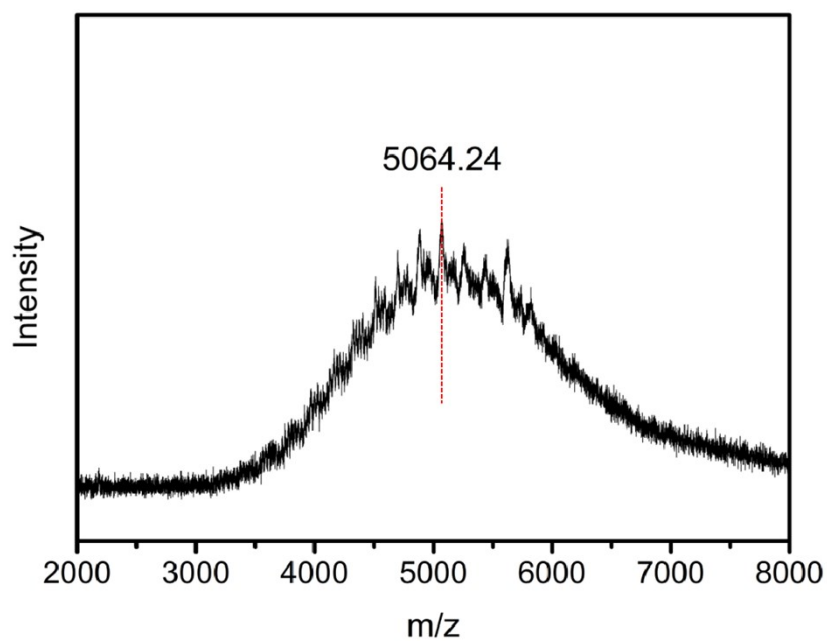

**Figure S3:** Positive MALDI-TOF-MS spectrum of  $\text{Ag}_{28}(\text{dppb})_6(\text{MoO}_4)_4$  cluster with DCTB (trans-2-[3-(4-tert-butylphenyl)-2-methyl-2-propenylidene]-malononitrile) matrix.

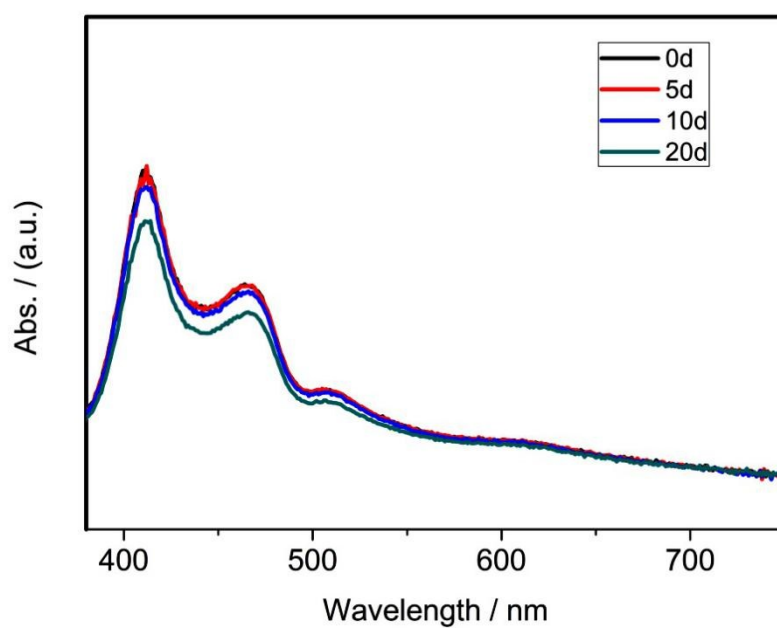

**Figure S4:** UV-vis absorption spectra of  $\text{Ag}_{28}(\text{dppb})_6(\text{MoO}_4)_4$  in  $\text{CH}_3\text{OH}$  solution in the dark at various days.

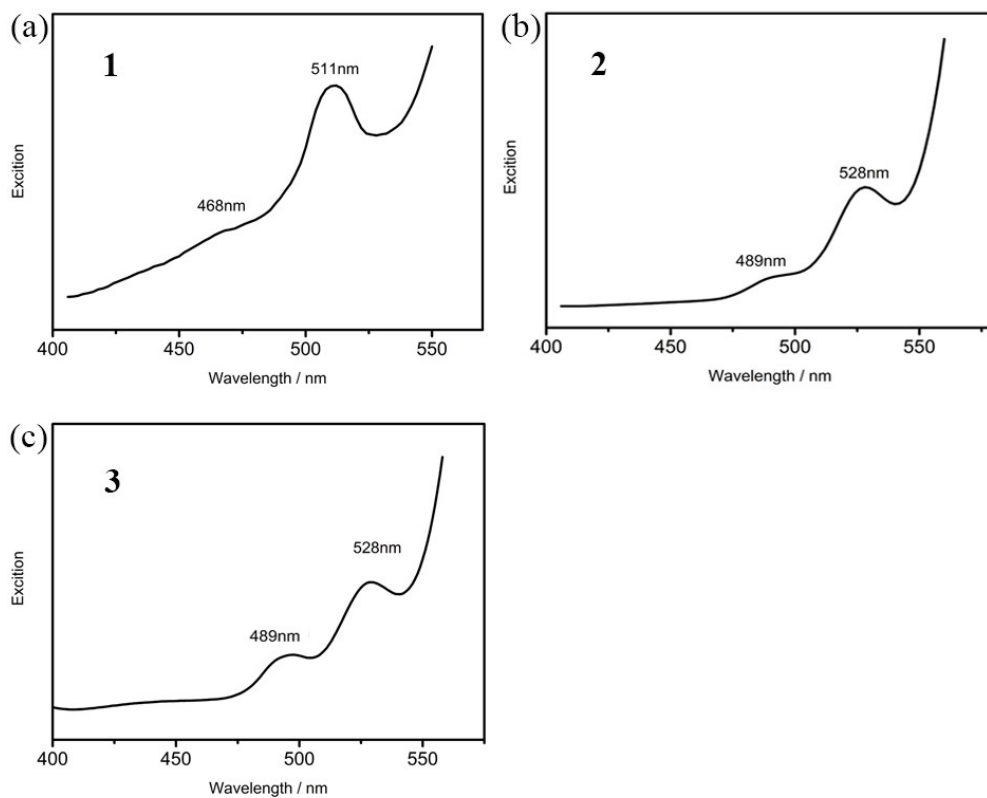

**Figure S5:** Excitation spectra of complexes **1-3** in CH<sub>3</sub>OH solution at room temperature.

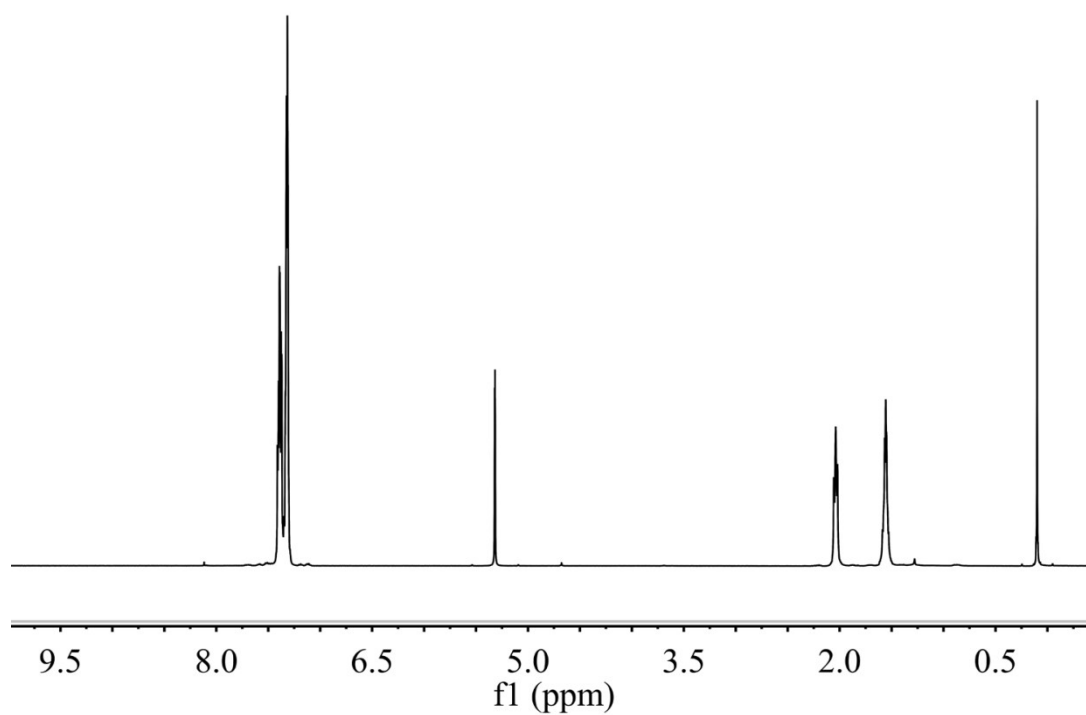

**Figure S6:**  $^1\text{H}$  NMR spectrum of  $\text{Ag}_{28}(\text{dppb})_6(\text{MoO}_4)_4$  in  $\text{CD}_2\text{Cl}_2$ .

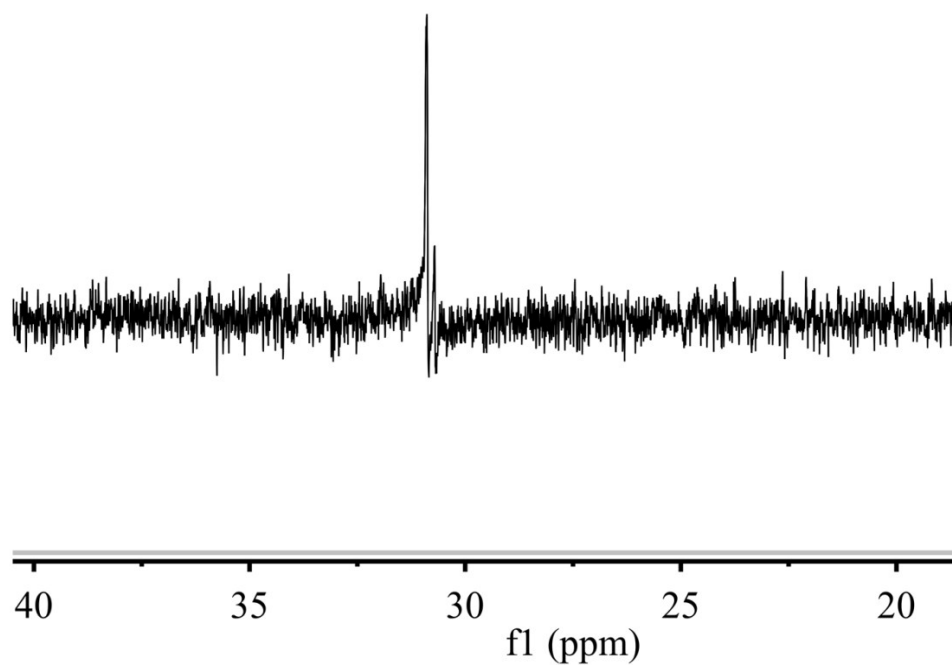

**Figure S7:**  $^{31}\text{P}$  NMR spectrum of  $\text{Ag}_{28}(\text{dppb})_6(\text{MoO}_4)_4$  in  $\text{CD}_2\text{Cl}_2$ .

Table 1. Crystal data and structure refinement for **1**

|                                   |                                          |
|-----------------------------------|------------------------------------------|
| Empirical formula                 | C173 H189 Ag28 Mo4 O21 P12               |
| Formula weight                    | 6379.99                                  |
| Crystal system                    | Monoclinic                               |
| Space group                       | <i>C2/c</i>                              |
| a                                 | 57.470(5)Å                               |
| b                                 | 33.556(3)Å                               |
| c                                 | 39.361(7)Å                               |
| $\alpha$                          | 90°                                      |
| $\beta$                           | 122.9670(10)°                            |
| $\gamma$                          | 90°                                      |
| Volume                            | 63684(14)Å <sup>3</sup>                  |
| Z                                 | 8                                        |
| $\rho_{calc}$                     | 1.331Mg/m <sup>3</sup>                   |
| Absorption coefficient            | 1.922 mm <sup>-1</sup>                   |
| F(000)                            | 24472                                    |
| Crystal size                      | 0.32 x 0.24 x 0.16 mm <sup>3</sup>       |
| Crystal color and habit           | black block                              |
| Theta range for data collection   | 2.829 to 24.786                          |
| Index ranges                      | -67 ≤ h ≤ 67, -39 ≤ k ≤ 39, -45 ≤ l ≤ 46 |
| Reflections collected             | 180080                                   |
| Independent reflections           | 53842 [R(int) = 0.0734]                  |
| Observed reflections (I > 2σ(I))  | 27271                                    |
| Goodness-of-fit on F <sup>2</sup> | 1.007                                    |
| Final R indices [I > 2σ(I)]       | R1 = 0.1177, wR2 = 0.3143                |
| R indices (all data)              | R1 = 0.1798, wR2 = 0.3572                |
| Largest diff. peak and hole       | 4.797 and -2.601 eÅ <sup>-3</sup>        |
| CCDC number                       | 1909219                                  |

Table 2. Crystal data and structure refinement for **2**

|                                                       |                                                               |
|-------------------------------------------------------|---------------------------------------------------------------|
| Empirical formula                                     | C168 H170 Ag28 O17 P12 W4                                     |
| Formula weight                                        | 6588.43                                                       |
| Crystal system                                        | Monoclinic                                                    |
| Space group                                           | <i>C2/c</i>                                                   |
| <i>a</i>                                              | 57.246(3)Å                                                    |
| <i>b</i>                                              | 33.4588(16)Å                                                  |
| <i>c</i>                                              | 38.553(4)Å                                                    |
| $\alpha$                                              | 90°                                                           |
| $\beta$                                               | 120.8820(10)°                                                 |
| $\gamma$                                              | 90°                                                           |
| Volume                                                | 63375(8)Å <sup>3</sup>                                        |
| <i>Z</i>                                              | 8                                                             |
| $\rho_{calc}$                                         | 1.381Mg/m <sup>-3</sup>                                       |
| Absorption coefficient                                | 3.036 mm <sup>-1</sup>                                        |
| F(000)                                                | 24848                                                         |
| Crystal size                                          | 0.240 x 0.200 x 0.160 mm <sup>3</sup>                         |
| Crystal color and habit                               | black block                                                   |
| Theta range for data collection                       | 1.088 to 24.711                                               |
| Index ranges                                          | -67<= <i>h</i> <=67, -39<= <i>k</i> <=39, -45<= <i>l</i> <=45 |
| Reflections collected                                 | 366423                                                        |
| Independent reflections                               | 53734 [R(int) = 0.0674]                                       |
| Observed reflections ( <i>I</i> > 2sigma( <i>I</i> )) | 37228                                                         |
| Goodness-of-fit on F <sup>2</sup>                     | 1.074                                                         |
| Final R indices [ <i>I</i> > 2sigma( <i>I</i> )]      | R1 = 0.1214, wR2 = 0.3161                                     |
| R indices (all data)                                  | R1 = 0.1762, wR2 = 0.3674                                     |
| Largest diff. peak and hole                           | 3.546 and -2.354 eÅ <sup>-3</sup>                             |
| CCDC number                                           | 1909220                                                       |

Table 3. Crystal data and structure refinement for **3**

|                                   |                                                               |
|-----------------------------------|---------------------------------------------------------------|
| Empirical formula                 | C337 H339 Ag32 Mo4 P24 O26 N3                                 |
| Formula weight                    | 9425.97                                                       |
| Crystal system                    | Monoclinic                                                    |
| Space group                       | <i>C</i> 2                                                    |
| <i>a</i>                          | 41.161(3)Å                                                    |
| <i>b</i>                          | 24.6172(13)Å                                                  |
| <i>c</i>                          | 40.061(2)Å                                                    |
| $\alpha$                          | 90°                                                           |
| $\beta$                           | 103.141(2)°                                                   |
| $\gamma$                          | 90°                                                           |
| Volume                            | 39529(4)Å <sup>3</sup>                                        |
| <i>Z</i>                          | 4                                                             |
| $\rho_{calc}$                     | 1.584Mg/m <sup>-3</sup>                                       |
| Absorption coefficient            | 1.42 mm <sup>-1</sup>                                         |
| F(000)                            | 18488                                                         |
| Crystal size                      | 0.320 x 0.240 x 0.160 mm <sup>3</sup>                         |
| Crystal color and habit           | black block                                                   |
| Theta range for data collection   | 0.971 to 25.382                                               |
| Index ranges                      | -49<= <i>h</i> <=49, -29<= <i>k</i> <=29, -48<= <i>l</i> <=48 |
| Reflections collected             | 259222                                                        |
| Independent reflections           | 72440 [R(int) = 0.0659]                                       |
| Goodness-of-fit on F <sup>2</sup> | 1.029                                                         |
| Final R indices [I>2sigma(I)]     | R1 = 0.0674, wR2 = 0.1802                                     |
| R indices (all data)              | R1 = 0.0819, wR2 = 0.1938                                     |
| Largest diff. peak and hole       | 3.140 and -2.177 eÅ <sup>-3</sup>                             |
| CCDC number                       | 1909221                                                       |



| Ag-Ag bond list of 1 |          |           |          |           |          |
|----------------------|----------|-----------|----------|-----------|----------|
| Ag1-Ag2              | 2.949(2) | Ag1-Ag3   | 2.951(2) | Ag1-Ag15  | 2.820(2) |
| Ag1-Ag16             | 2.952(2) | Ag1-Ag17  | 2.830(2) | Ag1-Ag23  | 2.689(2) |
| Ag1-Ag26             | 2.981(2) | Ag1-Ag27  | 3.264(2) | Ag2-Ag3   | 2.951(2) |
| Ag2-Ag4              | 2.830(2) | Ag2-Ag10  | 2.816(2) | Ag2-Ag11  | 2.976(2) |
| Ag2-Ag15             | 3.232(2) | Ag2-Ag25  | 2.971(2) | Ag2-Ag26  | 2.702(2) |
| Ag3-Ag4              | 3.255(2) | Ag3-Ag5   | 2.962(2) | Ag3-Ag23  | 2.965(2) |
| Ag3-Ag25             | 2.696(2) | Ag3-Ag27  | 2.840(2) | Ag3-Ag28  | 2.824(2) |
| Ag4-Ag5              | 2.833(2) | Ag4-Ag6   | 2.836(2) | Ag4-Ag10  | 2.966(2) |
| Ag4-Ag25             | 2.784(2) | Ag5-Ag6   | 2.813(2) | Ag5-Ag7   | 3.190(2) |
| Ag5-Ag25             | 2.764(2) | Ag5-Ag28  | 2.847(2) | Ag6-Ag7   | 2.948(2) |
| Ag6-Ag9              | 2.837(2) | Ag6-Ag10  | 3.222(2) | Ag6-Ag25  | 2.770(2) |
| Ag7-Ag9              | 2.826(2) | Ag7-Ag14  | 2.825(2) | Ag7-Ag21  | 2.960(2) |
| Ag7-Ag24             | 3.008(2) | Ag7-Ag25  | 2.695(2) | Ag8-Ag11  | 2.838(2) |
| Ag8-Ag12             | 2.956(2) | Ag8-Ag15  | 2.845(2) | Ag8-Ag17  | 3.161(2) |
| Ag8-Ag19             | 2.837(2) | Ag8-Ag26  | 2.752(2) | Ag9-Ag10  | 2.972(2) |
| Ag9-Ag12             | 2.962(2) | Ag9-Ag13  | 3.150(2) | Ag9-Ag14  | 3.009(2) |
| Ag9-Ag24             | 2.703(2) | Ag9-Ag25  | 3.010(2) | Ag10-Ag11 | 2.830(2) |
| Ag10-Ag12            | 2.959(2) | Ag10-Ag25 | 2.687(2) | Ag10-Ag26 | 2.996(2) |
| Ag11-Ag12            | 3.230(2) | Ag11-Ag15 | 2.845(2) | Ag11-Ag26 | 2.775(2) |
| Ag12-Ag13            | 2.830(2) | Ag12-Ag19 | 2.816(2) | Ag12-Ag24 | 2.967(2) |
| Ag12-Ag26            | 2.707(2) | Ag13-Ag14 | 2.825(2) | Ag13-Ag19 | 3.003(2) |

|           |          |           |          |           |          |
|-----------|----------|-----------|----------|-----------|----------|
| Ag13-Ag20 | 2.795(2) | Ag13-Ag24 | 2.770(2) | Ag14-Ag20 | 2.844(2) |
| Ag14-Ag21 | 3.081(2) | Ag14-Ag24 | 2.767(2) | Ag15-Ag17 | 2.946(2) |
| Ag15-Ag26 | 2.778(2) | Ag16-Ag17 | 2.837(2) | Ag16-Ag18 | 2.835(2) |
| Ag16-Ag22 | 3.167(2) | Ag16-Ag23 | 2.761(2) | Ag16-Ag27 | 2.847(2) |
| Ag17-Ag19 | 2.980(2) | Ag17-Ag22 | 2.945(2) | Ag17-Ag23 | 3.027(2) |
| Ag17-Ag26 | 2.681(2) | Ag18-Ag21 | 2.823(2) | Ag18-Ag22 | 2.909(2) |
| Ag18-Ag23 | 2.764(2) | Ag18-Ag27 | 2.829(2) | Ag18-Ag28 | 3.217(2) |
| Ag19-Ag20 | 3.077(2) | Ag19-Ag22 | 2.955(2) | Ag19-Ag24 | 2.698(2) |
| Ag19-Ag26 | 3.032(2) | Ag20-Ag21 | 2.988(2) | Ag20-Ag22 | 2.824(2) |
| Ag20-Ag24 | 2.762(2) | Ag21-Ag22 | 2.812(2) | Ag21-Ag23 | 3.008(2) |
| Ag21-Ag24 | 2.682(2) | Ag21-Ag28 | 2.983(2) | Ag22-Ag23 | 2.686(2) |
| Ag22-Ag24 | 2.991(2) | Ag23-Ag24 | 2.865(2) | Ag23-Ag25 | 2.863(2) |
| Ag23-Ag26 | 2.865(2) | Ag23-Ag27 | 2.772(2) | Ag23-Ag28 | 2.670(2) |
| Ag24-Ag25 | 2.869(2) | Ag24-Ag26 | 2.852(2) | Ag25-Ag26 | 2.872(2) |
| Ag25-Ag28 | 3.017(2) | Ag27-Ag28 | 2.947(2) |           |          |

| Ag-Ag bond list of 2 |          |          |          |           |          |
|----------------------|----------|----------|----------|-----------|----------|
| Ag1-Ag11             | 2.701(2) | Ag1-Ag18 | 2.964(3) | Ag1-Ag20  | 2.825(3) |
| Ag1-Ag17             | 2.852(2) | Ag1-Ag27 | 3.175(3) | Ag1-Ag28  | 2.928(3) |
| Ag1-Ag22             | 2.949(3) | Ag1-Ag23 | 3.028(3) | Ag2-Ag15  | 2.695(3) |
| Ag2-Ag22             | 2.840(3) | Ag2-Ag9  | 2.846(3) | Ag2-Ag16  | 2.947(2) |
| Ag2-Ag12             | 2.957(3) | Ag2-Ag3  | 2.989(3) | Ag2-Ag23  | 3.052(2) |
| Ag2-Ag19             | 3.122(3) | Ag3-Ag10 | 2.688(2) | Ag3-Ag4   | 2.814(3) |
| Ag3-Ag19             | 2.846(2) | Ag3-Ag16 | 2.963(3) | Ag3-Ag14  | 2.981(3) |
| Ag3-Ag15             | 3.002(2) | Ag3-Ag24 | 3.203(2) | Ag4-Ag15  | 2.692(2) |
| Ag4-Ag14             | 2.862(2) | Ag4-Ag5  | 2.963(3) | Ag4-Ag6   | 2.964(3) |
| Ag4-Ag10             | 3.000(2) | Ag4-Ag19 | 3.048(3) | Ag4-Ag26  | 3.181(2) |
| Ag5-Ag11             | 2.695(2) | Ag5-Ag18 | 2.824(3) | Ag5-Ag26  | 2.873(3) |
| Ag5-Ag27             | 2.957(3) | Ag5-Ag6  | 2.992(2) | Ag5-Ag15  | 3.032(3) |
| Ag5-Ag25             | 3.159(3) | Ag6-Ag10 | 2.689(3) | Ag6-Ag8   | 2.807(3) |
| Ag6-Ag25             | 2.848(3) | Ag6-Ag11 | 3.000(2) | Ag6-Ag7   | 3.006(3) |
| Ag6-Ag14             | 3.150(3) | Ag7-Ag10 | 2.763(2) | Ag7-Ag24  | 2.844(3) |
| Ag7-Ag14             | 2.849(3) | Ag7-Ag8  | 2.860(3) | Ag7-Ag13  | 3.083(3) |
| Ag8-Ag11             | 2.677(2) | Ag8-Ag17 | 2.937(3) | Ag8-Ag13  | 2.977(3) |
| Ag8-Ag25             | 2.979(3) | Ag8-Ag10 | 3.027(2) | Ag8-Ag28  | 3.211(3) |
| Ag9-Ag23             | 2.767(3) | Ag9-Ag21 | 2.840(3) | Ag9-Ag20  | 2.841(3) |
| Ag9-Ag22             | 2.941(3) | Ag9-Ag16 | 3.159(3) | Ag10-Ag13 | 2.683(2) |

|           |          |               |          |           |          |
|-----------|----------|---------------|----------|-----------|----------|
| Ag10-Ag14 | 2.758(2) | Ag10-Ag24     | 2.811(2) | Ag10-Ag23 | 2.855(2) |
| Ag10-Ag15 | 2.874(2) | Ag10-Ag11     | 2.895(2) | Ag10-Ag16 | 2.976(3) |
| Ag11-Ag27 | 2.776(3) | Ag11-Ag25     | 2.779(3) | Ag11-Ag28 | 2.784(3) |
| Ag11-Ag23 | 2.859(3) | Ag11-Ag15     | 2.879(2) | Ag11-Ag18 | 2.999(2) |
| Ag11-Ag17 | 3.016(3) | Ag12-Ag15     | 2.812(2) | Ag12-Ag22 | 2.832(3) |
| Ag12-Ag19 | 2.846(3) | Ag12-Ag26     | 2.860(3) | Ag12-Ag18 | 3.203(3) |
| Ag13-Ag16 | 2.837(3) | Ag13-Ag21     | 2.839(3) | Ag13-Ag24 | 2.979(3) |
| Ag13-Ag17 | 2.990(3) | Ag13-Ag23     | 2.990(2) | Ag14-Ag24 | 2.877(3) |
| Ag15-Ag18 | 2.698(2) | Ag(15)-Ag(26) | 2.756(2) | Ag15-Ag19 | 2.781(2) |
| Ag15-Ag23 | 2.869(2) | Ag15-Ag22     | 2.985(2) | Ag16-Ag23 | 2.682(3) |
| Ag16-Ag24 | 2.841(3) | Ag16-Ag21     | 2.996(3) | Ag17-Ag23 | 2.695(2) |
| Ag17-Ag28 | 2.856(3) | Ag17-Ag20     | 2.945(3) | Ag17-Ag21 | 3.176(3) |
| Ag18-Ag27 | 2.839(3) | Ag18-Ag26     | 2.953(3) | Ag18-Ag22 | 2.959(3) |
| Ag19-Ag26 | 2.840(3) | Ag20-Ag23     | 2.764(2) | Ag20-Ag21 | 2.838(3) |
| Ag20-Ag22 | 3.155(3) | Ag21-Ag23     | 2.769(3) | Ag22-Ag23 | 2.684(2) |
| Ag25-Ag27 | 2.836(3) | Ag25-Ag28     | 2.884(3) | Ag27-Ag28 | 2.815(3) |

| Ag-Ag bond list of 3 |          |           |          |           |          |
|----------------------|----------|-----------|----------|-----------|----------|
| Ag1-Ag2              | 2.856(2) | Ag1-Ag3   | 2.844(2) | Ag1-Ag4   | 3.033(2) |
| Ag1-Ag5              | 2.865(2) | Ag1-Ag6   | 2.772(2) | Ag1-Ag7   | 3.029(2) |
| Ag2-Ag3              | 2.862(2) | Ag2-Ag4   | 2.990(2) | Ag2-Ag6   | 2.776(2) |
| Ag2-Ag9              | 2.995(2) | Ag2-Ag10  | 2.871(2) | Ag3-Ag6   | 2.789(2) |
| Ag3-Ag7              | 3.088(2) | Ag3-Ag8   | 2.836(2) | Ag3-Ag9   | 3.057(3) |
| Ag4-Ag5              | 3.008(2) | Ag4-Ag6   | 2.680(2) | Ag4-Ag10  | 2.815(2) |
| Ag4-Ag16             | 3.010(2) | Ag4-Ag17  | 3.047(2) | Ag4-Ag18  | 2.817(2) |
| Ag5-Ag6              | 3.019(2) | Ag5-Ag7   | 2.797(2) | Ag5-Ag11  | 3.047(2) |
| Ag5-Ag15             | 2.685(2) | Ag5-Ag17  | 2.967(2) | Ag5-Ag27  | 3.129(2) |
| Ag6-Ag7              | 2.681(2) | Ag6-Ag8   | 2.987(2) | Ag6-Ag9   | 2.681(2) |
| Ag6-Ag10             | 3.058(2) | Ag6-Ag14  | 2.853(2) | Ag6-Ag15  | 2.876(2) |
| Ag6-Ag16             | 2.859(2) | Ag7-Ag8   | 3.054(2) | Ag7-Ag11  | 2.858(2) |
| Ag7-Ag12             | 2.997(2) | Ag7-Ag15  | 3.012(2) | Ag8-Ag9   | 2.802(2) |
| Ag8-Ag12             | 2.990(2) | Ag8-Ag13  | 3.032(2) | Ag8-Ag14  | 2.687(2) |
| Ag8-Ag26             | 3.059(2) | Ag9-Ag10  | 2.973(2) | Ag9-Ag13  | 2.847(2) |
| Ag9-Ag14             | 3.038(2) | Ag9-Ag22  | 3.018(2) | Ag10-Ag16 | 2.682(2) |
| Ag10-Ag18            | 2.988(2) | Ag10-Ag19 | 3.004(2) | Ag10-Ag22 | 2.990(2) |
| Ag11-Ag12            | 3.125(2) | Ag11-Ag15 | 2.773(2) | Ag11-Ag25 | 2.857(2) |
| Ag11-Ag27            | 2.860(2) | Ag12-Ag14 | 2.998(2) | Ag12-Ag15 | 2.683(2) |
| Ag12-Ag24            | 2.792(2) | Ag12-Ag25 | 3.059(2) | Ag12-Ag26 | 2.874(2) |
| Ag13-Ag14            | 2.768(2) | Ag13-Ag22 | 2.998(2) | Ag13-Ag23 | 2.889(2) |

|           |          |           |          |           |          |
|-----------|----------|-----------|----------|-----------|----------|
| Ag13-Ag26 | 2.832(2) | Ag14-Ag15 | 2.882(2) | Ag14-Ag16 | 2.862(2) |
| Ag14-Ag21 | 3.028(2) | Ag14-Ag22 | 2.681(2) | Ag14-Ag23 | 2.798(2) |
| Ag14-Ag24 | 2.671(2) | Ag14-Ag26 | 2.787(2) | Ag15-Ag16 | 2.863(2) |
| Ag15-Ag17 | 3.029(2) | Ag15-Ag24 | 3.004(2) | Ag15-Ag25 | 2.798(2) |
| Ag15-Ag27 | 2.781(2) | Ag15-Ag28 | 2.693(2) | Ag16-Ag17 | 2.679(2) |
| Ag16-Ag18 | 2.814(2) | Ag16-Ag19 | 2.762(2) | Ag16-Ag20 | 2.780(2) |
| Ag16-Ag21 | 2.689(2) | Ag16-Ag22 | 3.067(2) | Ag16-Ag28 | 2.998(2) |
| Ag18-Ag19 | 2.871(2) | Ag18-Ag20 | 2.864(2) | Ag19-Ag20 | 2.828(2) |
| Ag19-Ag21 | 2.990(2) | Ag19-Ag22 | 2.855(2) | Ag20-Ag21 | 3.115(2) |
| Ag20-Ag28 | 2.874(2) | Ag21-Ag22 | 2.815(2) | Ag21-Ag23 | 2.853(2) |
| Ag21-Ag24 | 3.025(2) | Ag21-Ag28 | 2.981(2) | Ag22-Ag23 | 3.013(2) |
| Ag23-Ag24 | 3.059(2) | Ag23-Ag26 | 2.878(2) | Ag24-Ag25 | 2.852(2) |
| Ag24-Ag26 | 3.069(2) | Ag24-Ag28 | 3.030(2) | Ag25-Ag27 | 2.864(2) |
| Ag25-Ag28 | 3.138(2) | Ag27-Ag28 | 2.997(2) |           |          |

## References

- (S1) Z. G. Jiang, K. Shi, Y. M. Lin and Q. M. Wang, *ChemComm.* **2014**, *50*, 2353-2355.  
(S2) Sheldrick, G. M. *Acta Crystallogr.* **2008**, *A64*, 112.
